# Supplementary material for: Systematic Analysis of the Maize PHD-Finger Gene Family Reveals a Subfamily Involved in Abiotic Stress Response
Source: MDPI journal article supplement (doi:10.3390/ijms161023517), 2015-09-30
Supplement: s1 [file s1]

## Supplementary Information

**Table S1.** The sequence of 20 identified motifs.

| Motif | Width | Conserved Amino Acid Sequences                                                                                                                                                                                       |
|-------|-------|----------------------------------------------------------------------------------------------------------------------------------------------------------------------------------------------------------------------|
| 1     | 72    | KENLCLYGYPNETWEVNLPAEEVPPPELPEPALGINFARDGMQEKDWLSLVAVH<br>SDAWLLSVAFYFGARFGFD                                                                                                                                        |
| 2     | 41    | FWICCDICEKWFHKGKCVKITPAKAEHIKQYKCPSCSNKRAR                                                                                                                                                                           |
| 3     | 39    | HYNPRTVEDVFRDFRGRAGMIKALTDDVEKFYQQCDPE                                                                                                                                                                               |
| 4     | 43    | CYICWDYGKMICCDRCDWWYHTYCMGPPHEQVPWGWYCPCCC                                                                                                                                                                           |
| 5     | 49    | KRLFTMINNLPTIFEVVTGTAKKQNKKEKNPNSNHSKNKSKSKMQTHEEP                                                                                                                                                                   |
| 6     | 28    | EEDLEEDDEEHQNTLCGTCGENYGADE                                                                                                                                                                                          |
| 7     | 200   | ISIFVKDAICNDQCLGRCLYIHGVPGTGKTMSVLAVMRRLRSEFDSGTLRPYCF<br>IEINGLKLASPENIYKVVEQLSGHRVGWKKALHYLTHEFSGGTKIGKQANQP<br>IILLIDELDLLMTRNQSVLYNILDWPTKPNSNLVVIGIANTMDLPEKLLPRISSR<br>MGIQRLCFGPYNYRQLQEITSRLKGIDAFEEQAIEFA   |
| 8     | 100   | CNMKLAVALTVLDECFIPMVDPRGTGIDMIHNVVYNCGSNFARLDFRGFYVVIL<br>EKGDEIIAVASIRIHGTCLAEMPFIGTRFMYRRQGMCRRLMNGIEKM                                                                                                            |
| 9     | 200   | WAARIESLWREPDGTFWAKVRWYIIEETAAGRQLHNLRLRELYRTNDLADIEM<br>ETILRHCSIMCPKDFRDANDGGDDVFYCEYEYDIHWHNFKRLADIGDEPETK<br>EDPSDEPYNAGDDYNSDTDEDSEYDEEEEPTSSFSVRGNQSHELAANSRKGR<br>YGLQKIGIQKIPHEVRCHQKTELEKAKATLLLATLPKSLPCR  |
| 10    | 200   | CKPKREGSGKKEDFYWPQDFVLGDVWVARSGKKSPMWPALVIDPLQHAPEV<br>VLNSCVPGALCVMFFGYANGHGRDYGWVKQGMIFPFVDYLDRFQGGPLYK<br>LRPTKFRAAIEEAFLAERGFFDLEMDGVCSPRKFVDKQSDPNGFQEEAASNNE<br>QECQSESQVVGKSALCCDSCGNRLPSKVSKKRKQGGEQMLCMHCE  |
| 11    | 20    | LWCQCYRCRTWYHPICYHQW                                                                                                                                                                                                 |
| 12    | 55    | CCHKGGGAMPTTVDGKWWHVFCAWWQPEVYFPDMETMEPIMGIMNIQHNY<br>FKCTC                                                                                                                                                          |
| 13    | 55    | CKICGGCEDEDKKFLICGHGLCSYKYYHILCLKEMQIASEVQRGLKCWYCPS<br>CLC                                                                                                                                                          |
| 14    | 152   | CRRAAEFADYRVKQSRQSAQNTVSANKGDGVVSMGDIEAAIQEVFQAPHIQV<br>MKNCPKFVKVILVAMVHELYKSGLGEIMFDKLATTVFSWCANRELLPGYDT<br>LLKICCKLGESKIILCEEGTKHKLQKVQLNYPSSDDVTFALKESPDLPW                                                     |
| 15    | 28    | SWNTSYEQRMFMSPTTISREVGPYPGYGP                                                                                                                                                                                        |
| 16    | 200   | ALRFNGWHPTEHGNLVDGDTGEEDPVGAVHSEENSGALVQLEDGTVAPLE<br>ANKTMCHDTLFDILISEKFAMLCDLLAATFHGSKPDDVIGLQIIDAKMRNGDY<br>AQNHAFDHDIKQIWKKFEHVGQEMAGLASSLLVISQASNQKQASGISEIDVA<br>EHKIEETSLVGVTTRKALREFTPPQCDSGYSTIPKRTGRSGSDGI |
| 17    | 89    | DNSWTWWTGGNISKRTLQRGALLHSTIRKAAARQGGKRRIAGLSYHEGSQFPR<br>RSRQFFWRACVGISQTSSQLALQVRYLDWHIRWKEFI                                                                                                                       |
| 18    | 200   | FKPQAYMNLNHNHGNIAASAAANIAHTSDEGKVSTSQLTAKHKKKMAADNAL<br>QLKAFSSAVTQFVWPSTEKKLMEVPRDRCGWCLACRSSAIGNKKACFLNMT<br>TSNAVKCSARILSVMRVIKNSDSHFPSIVAYLANMEESLRGLLVGSLQDMQQK<br>ERWRQQLQEASNCRTVIPLLELESNIRGVAFSASWFKPIDDWP  |

**Table S1. Cont.**

| Motif | Width | Conserved Amino Acid Sequences                                                                                                                                                                                      |
|-------|-------|---------------------------------------------------------------------------------------------------------------------------------------------------------------------------------------------------------------------|
| 19    | 200   | NSCLGDQTIDGNHDMSPFKNDDNVYISSSTRSLEKNLKSPSMKAVTNNADMI<br>PKVKIKGSKVSSLHYKDGEENTPKNDTGKATKLVIHLGSRHKTRSGSPKSELS<br>NYQREQDLGSIHGGKIDVTSQKGSRNEVKERSVMKLVRETGVQQRNSLLGD<br>LGTSKKHATGKRSNALISGMENGNETGTRNRPFAQKQSHSSQV |
| 20    | 112   | SNSSDFTKEEPSEPCPPVQAVELPPSSGDIHVPEDSISYLFVYNFLRSFSVQLFL<br>SPFGLDDFVAAINCTVQNNLLDWVHVSLLRALRRHLESKSAEGSQSASNCLK<br>YLDW                                                                                             |

**Table S3.** The information of orthologous genes among maize, rice and sorghum in Figure 5.

| Gene Name      | Sequence ID   | Orthologous Sorghum            | Gene Name      | Sequence ID   | Orthologous Rice                     |
|----------------|---------------|--------------------------------|----------------|---------------|--------------------------------------|
| <i>ZmPHD1</i>  | GRMZM5G862565 | Sb01g028420.1                  | <i>ZmPHD1</i>  | GRMZM5G862565 | LOC_Os10g42196.1                     |
| <i>ZmPHD3</i>  | GRMZM5G813111 | Sb01g008160.1                  | <i>ZmPHD3</i>  | GRMZM5G813111 | LOC_Os03g53700.1                     |
| <i>ZmPHD4</i>  | AC225147.4    | Sb01g003420.1<br>Sb01g003410.1 | <i>ZmPHD4</i>  | AC225147.4    | LOC_Os03g60400.1<br>LOC_Os03g60390.1 |
| <i>ZmPHD5</i>  | GRMZM2G403562 | Sb05g002930.1<br>Sb08g002920.1 | <i>ZmPHD5</i>  | GRMZM2G403562 | LOC_Os11g05130.1                     |
| <i>ZmPHD7</i>  | GRMZM2G047316 | Sb02g006980.1                  | <i>ZmPHD7</i>  | GRMZM2G047316 | LOC_Os07g12910.1                     |
| <i>ZmPHD8</i>  | GRMZM2G409224 | Sb02g032470.1                  | <i>ZmPHD8</i>  | GRMZM2G409224 | LOC_Os09g38440.1                     |
| <i>ZmPHD10</i> | GRMZM2G158194 | Sb03g003580.1                  | <i>ZmPHD10</i> | GRMZM2G158194 | LOC_Os01g08820.1                     |
| <i>ZmPHD11</i> | GRMZM2G085266 | Sb03g001640.1                  | <i>ZmPHD11</i> | GRMZM2G085266 | LOC_Os01g11952.1<br>LOC_Os01g66420.1 |
| <i>ZmPHD12</i> | GRMZM2G069886 | Sb08g019950.1                  | <i>ZmPHD15</i> | GRMZM2G080917 | LOC_Os05g34640.1                     |
| <i>ZmPHD13</i> | GRMZM2G081350 | Sb08g016700.1                  | <i>ZmPHD18</i> | GRMZM2G068331 | LOC_Os11g12650.1                     |
| <i>ZmPHD14</i> | GRMZM2G153087 | Sb05g007010.1                  | <i>ZmPHD19</i> | GRMZM2G008259 | LOC_Os11g14010.1<br>LOC_Os08g32620.1 |
| <i>ZmPHD15</i> | GRMZM2G080917 | Sb03g042180.1<br>Sb09g020610.1 | <i>ZmPHD21</i> | GRMZM5G871463 | LOC_Os09g21770.1<br>LOC_Os02g35600.1 |
| <i>ZmPHD16</i> | GRMZM2G025703 | Sb03g034510.1<br>Sb09g025810.1 | <i>ZmPHD22</i> | GRMZM2G107807 | LOC_Os04g36730.1                     |
| <i>ZmPHD17</i> | GRMZM2G314546 | Sb03g034510.1<br>Sb09g025810.1 | <i>ZmPHD23</i> | GRMZM2G067019 | LOC_Os02g39800.1                     |
| <i>ZmPHD18</i> | GRMZM2G068331 | Sb05g007460.1                  | <i>ZmPHD24</i> | GRMZM2G385338 | LOC_Os02g09920.1                     |
| <i>ZmPHD19</i> | GRMZM2G008259 | Sb05g007010.1<br>Sb08g006530.1 | <i>ZmPHD27</i> | GRMZM2G087482 | LOC_Os03g53630.1                     |
| <i>ZmPHD20</i> | GRMZM2G059266 | Sb07g000565.1                  | <i>ZmPHD29</i> | GRMZM2G466270 | LOC_Os06g51490.1<br>LOC_Os02g35600.1 |
| <i>ZmPHD21</i> | GRMZM5G871463 | Sb02g023940.1<br>Sb07g020610.1 | <i>ZmPHD30</i> | GRMZM2G063864 | LOC_Os04g36730.1<br>LOC_Os02g48800.1 |
| <i>ZmPHD22</i> | GRMZM2G107807 | Sb04g023220.1<br>Sb06g017810.1 | <i>ZmPHD31</i> | GRMZM2G045544 | LOC_Os06g20410.1                     |
|                |               |                                | <i>ZmPHD33</i> | GRMZM2G039895 | LOC_Os08g01420.1                     |
|                |               |                                | <i>ZmPHD37</i> | GRMZM2G168249 | LOC_Os06g08790.1                     |

Table S3. Cont.

| Gene Name      | Sequence ID   | Orthologous Sorghum | Gene Name      | Sequence ID   | Orthologous Rice |
|----------------|---------------|---------------------|----------------|---------------|------------------|
| <i>ZmPHD22</i> | GRMZM2G107807 | Sb04g023220.1       | <i>ZmPHD33</i> | GRMZM2G039895 | LOC_Os08g01420.1 |
|                |               | Sb06g017810.1       | <i>ZmPHD37</i> | GRMZM2G168249 | LOC_Os06g08790.1 |
| <i>ZmPHD23</i> | GRMZM2G067019 | Sb04g025725.1       |                |               | LOC_Os02g52960.1 |
| <i>ZmPHD24</i> | GRMZM2G385338 | Sb04g006240.1       | <i>ZmPHD38</i> | GRMZM2G330024 | LOC_Os06g10690.1 |
| <i>ZmPHD27</i> | GRMZM2G087482 | Sb01g008195.1       |                |               | LOC_Os01g06540.1 |
| <i>ZmPHD28</i> | GRMZM2G466292 | Sb10g031260.1       | <i>ZmPHD39</i> | GRMZM2G148810 | LOC_Os05g07040.1 |
| <i>ZmPHD29</i> | GRMZM2G466270 | Sb10g031265.1       | <i>ZmPHD41</i> | GRMZM2G412492 | LOC_Os07g07690.1 |
|                |               | Sb04g023220.1       |                |               | LOC_Os03g58530.1 |
| <i>ZmPHD30</i> | GRMZM2G063864 | Sb06g017810.1       | <i>ZmPHD42</i> | GRMZM2G097726 | LOC_Os07g08880.1 |
|                |               | Sb10g011813.1       |                |               | LOC_Os08g32620.1 |
| <i>ZmPHD31</i> | GRMZM2G045544 | Sb04g029710.1       | <i>ZmPHD44</i> | GRMZM2G091265 | LOC_Os09g21770.1 |
| <i>ZmPHD32</i> | GRMZM2G368206 | Sb04g034380.1       | <i>ZmPHD46</i> | GRMZM2G128176 | LOC_Os07g46690.1 |
| <i>ZmPHD33</i> | GRMZM2G039895 | Sb07g000565.1       | <i>ZmPHD47</i> | GRMZM2G434715 | LOC_Os07g49290.1 |
| <i>ZmPHD34</i> | GRMZM2G134214 | Sb10g000260.1       |                |               | LOC_Os01g06540.1 |
| <i>ZmPHD35</i> | GRMZM2G103230 | Sb10g001106.1       | <i>ZmPHD48</i> | GRMZM5G893976 | LOC_Os05g07040.1 |
| <i>ZmPHD36</i> | GRMZM2G473258 | Sb10g026360.1       | <i>ZmPHD49</i> | GRMZM2G372928 | LOC_Os01g11952.1 |
|                |               | Sb10g006890.1       | <i>ZmPHD50</i> | GRMZM2G158918 | LOC_Os05g34640.1 |
| <i>ZmPHD38</i> | GRMZM2G330024 | Sb04g034380.1       | <i>ZmPHD52</i> | GRMZM2G335720 | LOC_Os01g36670.1 |
|                |               | Sb03g005320.1       | <i>ZmPHD53</i> | GRMZM2G170412 | LOC_Os01g46700.1 |
| <i>ZmPHD39</i> | GRMZM2G148810 | Sb09g004740.1       | <i>ZmPHD54</i> | GRMZM2G149587 | LOC_Os01g73460.1 |
| <i>ZmPHD40</i> | GRMZM2G016817 | Sb09g020610.1       | <i>ZmPHD56</i> | GRMZM2G455243 | LOC_Os06g08790.1 |
| <i>ZmPHD41</i> | GRMZM2G412492 | Sb02g004100.1       | <i>ZmPHD57</i> | GRMZM2G156129 | LOC_Os06g01170.1 |
| <i>ZmPHD42</i> | GRMZM2G097726 | Sb02g004890.1       |                |               | LOC_Os03g19020.1 |
|                |               | Sb02g023940.1       | <i>ZmPHD59</i> | GRMZM5G889372 | LOC_Os07g49030.1 |
| <i>ZmPHD44</i> | GRMZM2G091265 | Sb07g020610.1       | <i>ZmPHD60</i> | GRMZM2G178072 | LOC_Os03g04980.1 |
| <i>ZmPHD45</i> | GRMZM2G316191 | Sb02g033850.1       | <i>ZmPHD62</i> | GRMZM2G365888 | LOC_Os12g34330.1 |
| <i>ZmPHD46</i> | GRMZM2G128176 | Sb02g042000.1       | <i>ZmPHD65</i> | GRMZM2G156088 | LOC_Os04g36730.1 |
|                |               | Sb02g043960.1       | <i>ZmPHD66</i> | GRMZM2G050495 | LOC_Os02g35600.1 |
| <i>ZmPHD47</i> | GRMZM2G434715 | Sb01g038485.1       | <i>ZmPHD67</i> | GRMZM2G038050 | LOC_Os04g59510.1 |
|                |               | Sb03g005320.1       |                |               |                  |
| <i>ZmPHD48</i> | GRMZM5G893976 | Sb09g004740.1       |                |               |                  |
| <i>ZmPHD49</i> | GRMZM2G372928 | Sb03g001640.1       |                |               |                  |
| <i>ZmPHD50</i> | GRMZM2G158918 | Sb09g020610.1       |                |               |                  |
| <i>ZmPHD52</i> | GRMZM2G335720 | Sb03g025310.1       |                |               |                  |
| <i>ZmPHD53</i> | GRMZM2G170412 | Sb03g029850.1       |                |               |                  |
| <i>ZmPHD54</i> | GRMZM2G149587 | Sb03g046950.1       |                |               |                  |
| <i>ZmPHD56</i> | GRMZM2G455243 | Sb10g005910.1       |                |               |                  |
| <i>ZmPHD58</i> | GRMZM2G472428 | Sb10g000310.1       |                |               |                  |
| <i>ZmPHD59</i> | GRMZM5G889372 | Sb01g037770.1       |                |               |                  |
| <i>ZmPHD60</i> | GRMZM2G178072 | Sb01g047350.1       |                |               |                  |
| <i>ZmPHD61</i> | GRMZM2G314661 | Sb05g002930.1       |                |               |                  |
| <i>ZmPHD63</i> | GRMZM2G115424 | Sb08g006530.1       |                |               |                  |

**Table S3. Cont.**

| Gene Name      | Sequence ID   | Orthologous Sorghum | Gene Name | Sequence ID | Orthologous Rice |
|----------------|---------------|---------------------|-----------|-------------|------------------|
| <i>ZmPHD64</i> | GRMZM2G404426 | Sb07g006270.1       |           |             |                  |
| <i>ZmPHD65</i> | GRMZM2G156088 | Sb06g017810.1       |           |             |                  |
| <i>ZmPHD66</i> | GRMZM2G050495 | Sb04g023220.1       |           |             |                  |
| <i>ZmPHD67</i> | GRMZM2G038050 | Sb06g034065.1       |           |             |                  |

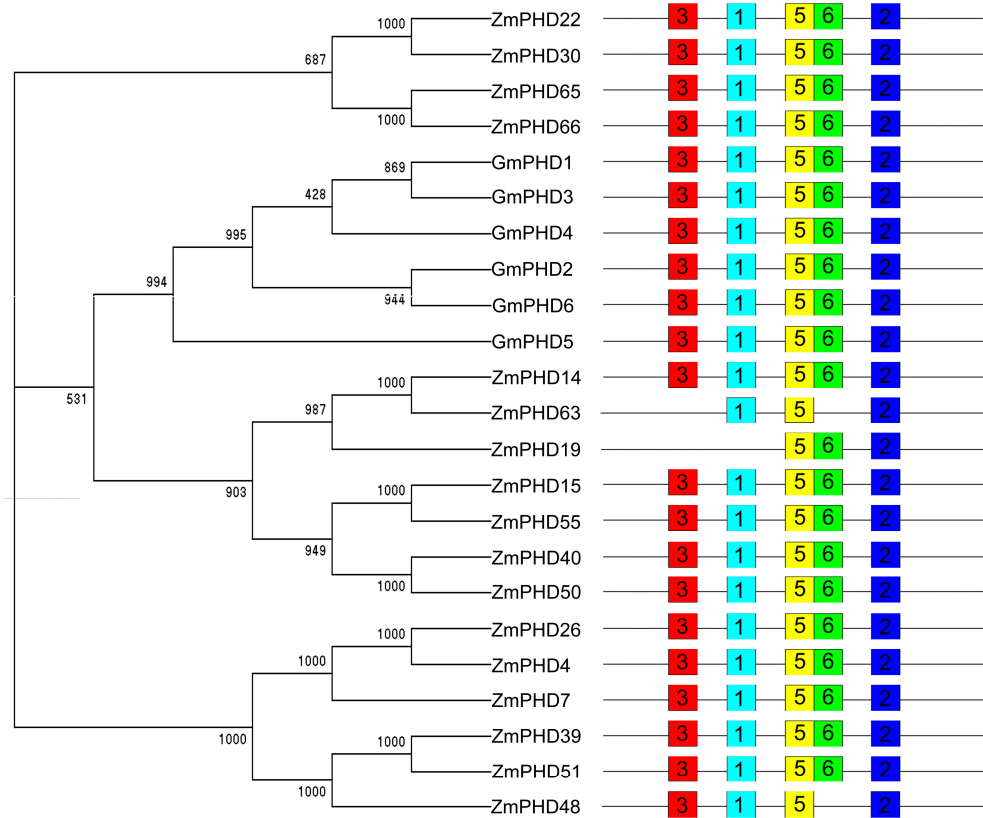

**Figure S1.** Phylogenetic relationship and motifs of 17 ZmPHD and 6 GmPHD proteins. The Phylogenetic tree is generated by MEGA software, and all the conserved motifs are identified by online MEME program. Motif 2 represents the PHD domain and other motifs are functions unknown.

**Table S4.** The number of *cis*-element in the promoters of group IX genes.

| Gene Name      | ABRE Number | DRE Number | MYBE Number |
|----------------|-------------|------------|-------------|
| <i>ZmPHD4</i>  | 2           | 1          | 7           |
| <i>ZmPHD7</i>  | 1           | 1          | 1           |
| <i>ZmPHD14</i> | 3           | 3          | 6           |
| <i>ZmPHD15</i> | 1           | 2          | 1           |
| <i>ZmPHD19</i> | 6           | 0          | 3           |
| <i>ZmPHD22</i> | 4           | 1          | 1           |
| <i>ZmPHD26</i> | 7           | 1          | 3           |

**Table S4. Cont.**

| Gene Name      | ABRE Number | DRE Number | MYBE Number |
|----------------|-------------|------------|-------------|
| <i>ZmPHD30</i> | 2           | 2          | 3           |
| <i>ZmPHD39</i> | 3           | 1          | 3           |
| <i>ZmPHD40</i> | 1           | 0          | 5           |
| <i>ZmPHD48</i> | 2           | 2          | 6           |
| <i>ZmPHD50</i> | 1           | 2          | 5           |
| <i>ZmPHD51</i> | 0           | 0          | 7           |
| <i>ZmPHD55</i> | 5           | 3          | 2           |
| <i>ZmPHD63</i> | 3           | 3          | 3           |
| <i>ZmPHD65</i> | 0           | 1          | 6           |
| <i>ZmPHD66</i> | 0           | 1          | 6           |

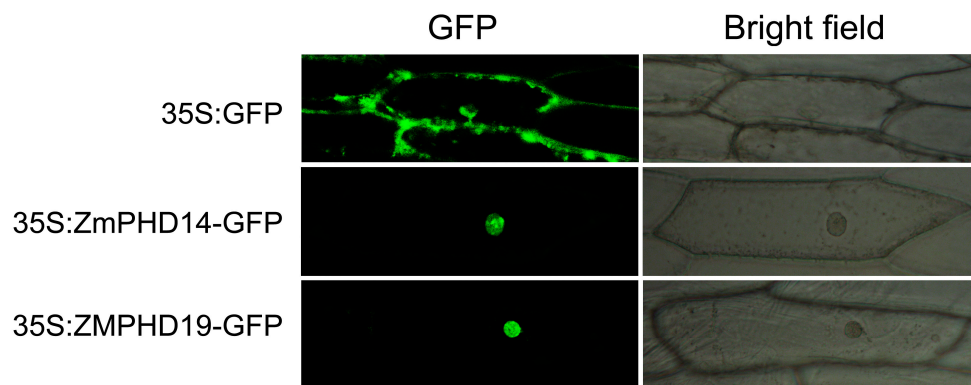

**Figure S2.** Subcellular localization of ZmPHD14-GFP and ZmPHD19-GFP in onion epidermal cells. The GFP fluorescence was visualized by fluorescence microscopy under bright-field and UV light. The 35S-GFP was as control. The green color are GFP protein signal.

**Table S5.** Maize *PHD* gene-specific primers used for qRT-PCR analysis.

| Primer Name    | Forward Primer (5'→3') Sequence | Reverse Primer (5'→3') Sequence |
|----------------|---------------------------------|---------------------------------|
| <i>ZmPHD4</i>  | TCTGACTCGTGGCTCATCTCA           | ATAAGCGCTTCCGGTCGTT             |
| <i>ZmPHD7</i>  | CACGGCAAATGTGTGAGGAT            | TGCAATCAGGGCACTTGTAGTG          |
| <i>ZmPHD14</i> | GATGGGATGGATGAAAAAGATTG         | GCAACAGACATTAGCCAAGAATCA        |
| <i>ZmPHD15</i> | GAGGAAGTGCCCCAGAGA              | ATGCCATCCCTAGCAAAGTTGA          |
| <i>ZmPHD19</i> | GCAATAAAGCTGGCCCAAAA            | GCATCTTCGAACCCCTTGAG            |
| <i>ZmPHD22</i> | CAGAACCAGCACTGGGCATA            | GAGACAACCAGTCTTTTCAACCA         |
| <i>ZmPHD26</i> | TCCCAACAGGACGGCTACA             | TCGCGTGCCGGAGAGA                |
| <i>ZmPHD30</i> | GGTCACTCTTCCAGCTGAGGAA          | AAAGTTTATCCCCAGTGCTGGTT         |
| <i>ZmPHD39</i> | GCGTTTGTTTGGCATGATGA            | CCACCGGAGACGACTTCAA             |
| <i>ZmPHD40</i> | CGGTTTGGGTTTGACAAAGAG           | TTGTGGGCAAGTTATTTATCATGTTG      |
| <i>ZmPHD48</i> | TCTCCGGTGCGAGACAACA             | AGGCTTGGCTCTACCACCATT           |
| <i>ZmPHD50</i> | TCCTGGTTACTAGCAGTTGCATTCTA      | CGTCTGGCCTCTTTGTCAAAC           |
| <i>ZmPHD51</i> | GCGTTTGTTTCGGCATGATG            | TCACACCACTGGAGACGACTTC          |

**Table S5. Cont.**

| <b>Primer Name</b> | <b>Forward Primer (5'→3') Sequence</b> | <b>Reverse Primer (5'→3') Sequence</b> |
|--------------------|----------------------------------------|----------------------------------------|
| <i>ZmPHD55</i>     | TGGTGAGTGCGCTCGATCT                    | CTCCTCGGCTATCACTCCACAT                 |
| <i>ZmPHD63</i>     | CTGTGCGGCGCATGTG                       | TCTCGCATAAGTCGCAACAGA                  |
| <i>ZmPHD65</i>     | TGTGCGACCCAGAGTATAAGGA                 | TTCAC TTCCCAGGTTTTGTTAGG               |
| <i>ZmPHD66</i>     | CGGCTCCACATGATGATCAA                   | CTCCCCACTCCCTATCACA ACT                |
| <i>ZmGAPDH</i>     | CCCTTCATCACCACGGACTAC                  | AACCTTCTTGGCACCACCCT                   |
